# Supplementary material for: Effect of Nirmatrelvir/Ritonavir (Paxlovid) on Hospitalization among Adults with COVID-19: an EHR-based Target Trial Emulation from N3C
Source: PubMed Central journal article supplement (PMC10187454; doi:10.1101/2023.05.03.23289084), 2023-05-04
Supplement: NIHPP2023.05.03.23289084v1-supplement-1.pdf [file NIHPP2023.05.03.23289084v1-supplement-1.pdf]

## Supplementary Tables and Figures

**Fig. 1** Proportion of individuals in base population stratified by Race/Ethnicity, and ZIP Code-level Community Wellbeing Index (CWBI)

**Percentage of Total Individuals**

| Race/Ethnicity       | 0-45  | 46-55  | 56-65  | 65+    | Missing |
|----------------------|-------|--------|--------|--------|---------|
| Asian (non-Hispanic) | 0.02% | 9.76%  | 40.35% | 13.24% | 36.63%  |
| Black (non-Hispanic) | 1.11% | 23.89% | 55.42% | 6.4%   | 13.17%  |
| Hispanic or Latino   | 0.07% | 16.22% | 36.34% | 10.33% | 37.05%  |
| White (non-Hispanic) | 0.44% | 33.9%  | 36.51% | 4.5%   | 24.65%  |
| Other (non-Hispanic) | 0.2%  | 36.56% | 20.46% | 2.64%  | 40.14%  |
| Missing              | 0.12% | 8.84%  | 23.92% | 8.38%  | 58.73%  |

CWBI

**Table 1** Sensitivity analysis examining the effects of immortal time bias, and missingness in the ZIP Code-level Community Wellbeing Index (CWBI)

|                          | <i>Dependent variable: Hospitalization</i> |                         |                                  |
|--------------------------|--------------------------------------------|-------------------------|----------------------------------|
|                          | Not accounting for Immortal Time Bias      | Dropping CWBI covariate | Dropping sites with missing CWBI |
|                          | OR (95% CI)                                | OR (95% CI)             | OR (95% CI)                      |
| Paxlovid Treatment       |                                            |                         |                                  |
| No (control)             | <i>ref</i>                                 | <i>ref</i>              | <i>ref</i>                       |
| Yes (treatment)          | 0.38 (0.31-0.46)***                        | 0.37 (0.31-0.45)***     | 0.37 (0.29-0.47)***              |
| <i>Observations</i>      | 410,716                                    | 455,504                 | 272,133                          |
| <i>Log Likelihood</i>    | -29151.5                                   | -29618.4                | -20744.2                         |
| <i>Akaike Inf. Crit.</i> | 58376.9                                    | 59296.7                 | 41562.4                          |

Note:  $p < .05^*$ ,  $p < .01^{**}$ ,  $p < .001^{***}$
